# Supplementary material
Source: publisher figshare collection journal article supplement (https://acs.figshare.com/ndownloader/files/23315720)
Supplement: Supplementary file 1 [file 23315720]

**Supporting Information for**

“Drastic Tuning of the Electronic Structures of Diruthenium Aryl Complexes by  
Isoelectronic Axial Ligands”

*Adharsh Raghavan, Fang Yuan and Tong Ren\**

## TABLE OF CONTENTS

|                                                                                                                                                     |         |
|-----------------------------------------------------------------------------------------------------------------------------------------------------|---------|
| 1. Experimental details .....                                                                                                                       | S3      |
| 2. Mass spectrometry (ESI-MS)                                                                                                                       |         |
| <b>Figure S1.</b> ESI-MS of (NC)Ru <sub>2</sub> ( <i>ap</i> ) <sub>4</sub> (C <sub>6</sub> H <sub>4</sub> -4-NMe <sub>2</sub> ) ( <b>2</b> ).....   | S5      |
| <b>Figure S2.</b> ESI-MS of (HCC)Ru <sub>2</sub> ( <i>ap</i> ) <sub>4</sub> (C <sub>6</sub> H <sub>4</sub> -4-NMe <sub>2</sub> ) ( <b>3</b> ) ..... | S6      |
| <b>Figure S3.</b> ESI-MS of (OC)Ru <sub>2</sub> ( <i>ap</i> ) <sub>4</sub> (C <sub>6</sub> H <sub>4</sub> -4-NMe <sub>2</sub> ) ( <b>4</b> ) .....  | S7      |
| 3. Crystallographic details                                                                                                                         |         |
| <b>Table S1.</b> Selected bond metrics for <b>2–4</b> .....                                                                                         | S9      |
| <b>Table S2.</b> Crystallographic details for <b>2</b> .....                                                                                        | S10     |
| <b>Table S3.</b> Crystallographic details for <b>3</b> .....                                                                                        | S11     |
| <b>Table S4.</b> Crystallographic details for <b>4</b> .....                                                                                        | S12     |
| 4. <sup>1</sup> H NMR spectroscopy                                                                                                                  |         |
| <b>Figure S4.</b> <sup>1</sup> H NMR spectrum of <b>2</b> at 293 K in CDCl <sub>3</sub> .....                                                       | S12     |
| <b>Figure S5.</b> <sup>1</sup> H NMR spectrum of <b>3</b> at 293 K in CDCl <sub>3</sub> .....                                                       | S13     |
| <b>Figure S6.</b> Evans method magnetometry of <b>4</b> in C <sub>6</sub> D <sub>6</sub> .....                                                      | S14     |
| <b>Figure S7a-b.</b> Variable temperature (VT) NMR spectrum of <b>3</b> in CDCl <sub>3</sub> .....                                                  | S15     |
| <b>Figure S8a-c.</b> VT-NMR chemical shift analyses for C≡C– <b>H</b> , N(CH <sub>3</sub> ) <sub>2</sub> and aryl(CH) protons of <b>3</b> .....     | S16–17  |
| 5. Electrochemistry                                                                                                                                 |         |
| <b>Figure S9.</b> Cyclic and Differential Pulse Voltammetry of <b>2–4</b> .....                                                                     | S18     |
| <b>Table S5.</b> Redox potentials for <b>1–4</b> .....                                                                                              | S18     |
| <b>Table S6.</b> Voltammetry and IR spectroscopy of Ru <sub>2</sub> –CO complexes in the literature .....                                           | S19     |
| 6. Dissociation of CO from compound <b>4</b>                                                                                                        |         |
| <b>Figure S10.</b> UV-Vis/NIR absorption spectrum .....                                                                                             | S20     |
| <b>Figure S11.</b> Cyclic Voltammogram of <b>1</b> and <b>4</b> .....                                                                               | S20     |
| 7. SQUID magnetometry                                                                                                                               |         |
| <b>Figure S12.</b> χ <sub>m</sub> and μ <sub>eff</sub> vs. T, <b>1</b> .....                                                                        | S21     |
| <b>Figure S13.</b> χ <sub>m</sub> and μ <sub>eff</sub> vs. T, <b>4</b> .....                                                                        | S22     |
| 8. Computational details                                                                                                                            |         |
| <b>Figure S14.</b> DFT optimized structure of <b>4</b> .....                                                                                        | S23     |
| <b>Table S7.</b> Bond metrics of the optimized structure <b>4'</b> .....                                                                            | S23     |
| <b>Figure S15.</b> Frontier molecular orbitals of <b>4'</b> .....                                                                                   | S24     |
| <b>Figure S16.</b> Mulliken spin density plot for <b>4'</b> .....                                                                                   | S24     |
| <b>Figure S17.</b> TD-DFT-calculated spectrum of <b>4'</b> .....                                                                                    | S25     |
| 9. References .....                                                                                                                                 | S25–S26 |

## EXPERIMENTAL DETAILS

**General.**  $\text{Ru}_2(\text{ap})_4\text{Cl}^1$  and  $\text{Ru}_2(\text{ap})_4(\text{C}_6\text{H}_4\text{-4-NMe}_2)$  (**1**)<sup>2</sup> were prepared using literature methods.  $n\text{BuLi}$  (1.6 M in hexanes) was purchased from Sigma-Aldrich. Bis(trimethylsilyl)-1,3-butadiyne was purchased from Alfa Aesar and freshly sublimed before use. Sodium acetylide (18 wt% slurry in xylene,  $\rho = 0.89 \text{ g/mL}$ ) was purchased from Sigma-Aldrich. KCN and  $[\text{Bu}_4\text{N}][\text{PF}_6]$  were purchased from commercial sources and used as received. Tetrahydrofuran was freshly distilled over sodium/benzophenone prior to use. All reactions were performed under dry  $\text{N}_2$  atmosphere implementing standard Schlenk techniques where noted. UV-Vis/NIR spectra were obtained with a JASCO V-670 spectrophotometer in THF solutions.  $^1\text{H}$  NMR spectra were recorded on a Varian Inova 300 spectrometer operating at 300 MHz. Cyclic and differential pulse voltammograms were recorded in 0.1 M  $[\text{Bu}_4\text{N}][\text{PF}_6]$  solution (THF, Ar or  $\text{N}_2$ -degassed) on a CHI620A voltammetric analyzer with a glassy carbon working electrode (diameter = 2 mm), a Pt-wire auxiliary electrode, and a Ag/AgCl quasi-reference electrode. The concentration of  $\text{Ru}_2$ -species is always ca. 1.0 mM. The  $\text{Fc}^{+/0}$  couple was observed at ca.  $0.542 \pm 0.113 \text{ V}$  (vs Ag/AgCl QRE) at the noted experimental conditions. Electrospray ionization mass spectra (ESI-MS) were collected on an Advion expression<sup>L</sup> mass spectrometer with an  $m/z$  range of 10 – 2000. Elemental analyses were performed by Atlantic Microlab, Inc. DC temperature-dependent magnetization was measured from 2 to 300 K using zero-field-cooling (ZFC) mode on a Quantum Design MPMS-3 SQUID magnetometer. Both compound **1** and **4** were measured under a magnetic field of 1000 Oe with a cooling rate of 2 K/min. The whole magnetic measurement was done under vacuum of a few torr.

**Synthesis of  $(\text{N}\equiv\text{C})\text{Ru}_2(\text{ap})_4(\text{C}_6\text{H}_4\text{-4-NMe}_2)$  (**2**).** To a 20 mL solution of **1** (60 mg, 0.06 mmol) in THF was added a 10 mL solution of KCN 20 mg, 0.31 mmol) in MeOH. A rapid color change from black to deep red/purple was observed.  $\text{O}_2$  was bubbled through the reaction mixture for 10 minutes during which a distinct color to violet was observed. The solvents were removed in vacuo and the product was extracted from  $\text{CH}_2\text{Cl}_2/\text{H}_2\text{O}$ . The organic layers were collected, and the product was recrystallized from a 1:20 (v:v)  $\text{CH}_2\text{Cl}_2$ :hexanes mixture at  $-20^\circ\text{C}$ , as a dark violet microcrystalline solid. Yield: 51 mg, 83%. Crystals suitable for X-ray diffraction analysis were grown by layering hexanes over a concentrated solution of **2** in THF.

Data for **2**. Anal. Found (Calcd.) for  $\text{C}_{54}\text{H}_{50}\text{N}_{10}\text{OCl}_2\text{Ru}_2$  (**2**· $\text{CH}_2\text{Cl}_2$ · $\text{H}_2\text{O}$ ): C, 57.52 (57.49); H, 4.43 (4.47); N, 12.34 (12.42). ESI-MS ( $m/z$ , based on  $^{101}\text{Ru}$ ):  $[\text{M}+\text{H}]^+ = 1027.4$ . UV-Vis (in THF)  $\lambda$ , nm, ( $\epsilon$ ,  $\text{M}^{-1}\text{cm}^{-1}$ ): 345 (13000), 440 (2500, sh), 550 (4000), 600 (3900), 667 (3500), 740 (2400, sh), 1014 (2900). IR  $\bar{\nu}$ ,  $\text{cm}^{-1}$ : 2084,  $\nu(\text{C}\equiv\text{N})$ . Electrochemistry (THF, vs.  $\text{Fc}^{+/0}$ ),  $E_{1/2}/\text{V}$ ,  $\Delta E_p/\text{mV}$ ,  $i_{\text{forward}}/i_{\text{backward}}$ :  $-0.11$ , 64, 1.1;  $0.30$ , 62, 1.2;  $-0.98$ , 65, 1.1.  $^1\text{H}$  NMR (300 MHz,  $293 \text{ K}$ ,  $\text{CDCl}_3$ )  $\delta$  = 3.21 (s, 6H,  $\text{N}(\text{CH}_3)_2$ ), 5.60 (br, 4H, *ap*), 6.07 (t, 8H, *ap*, 6.4 Hz), 6.14 (d, 2H, aryl, 6.6 Hz), 6.28 (d, 4H, *ap*, 9.0 Hz), 6.69 (d, 2H, aryl, 6.6 Hz), 6.77–7.21 (m, 16H, *ap*), 7.99 (d, 4H, *ap*, 6.9 Hz).

**Synthesis of  $(\text{HC}\equiv\text{C})\text{Ru}_2(\text{ap})_4(\text{C}_6\text{H}_4\text{-4-NMe}_2)$  (**3**).** Sodium acetylide slurry (1.1 mL, 18 wt%, ca. 3.7 mmol) was added to a 10 mL THF solution of **1** (60 mg, 0.060 mmol). The color of the solution gradually changed from red-black to blue-black over the course of 24 h under  $\text{N}_2$ . Aliquots of the reaction mixture were retrieved for TLC analysis. The ratio of the starting material to product (ca. 2:3) did not noticeably change after 24–36 h despite addition of excess sodium acetylide. At this juncture,  $\text{O}_2$  was bubbled through the reaction mixture for 30 minutes. The crude reaction mixture was purified by column chromatography. The blue fraction was eluted with triethylamine/EtOAc/hexanes (1/10/70, v/v/v). Yield: 22 mg, 36%. Crystals suitable for X-ray diffraction analysis were grown by layering hexanes over a concentrated solution of **3** in THF.

Data for **3**. Anal. Found (Calcd.) for  $\text{C}_{62}\text{H}_{71}\text{N}_9\text{O}_6\text{Ru}_2$  (**3**·2THF·4H<sub>2</sub>O): C, 59.78 (60.03); H, 5.45 (5.77); N, 9.90 (10.16). ESI-MS ( $m/z$ , based on  $^{101}\text{Ru}$ ):  $[\text{M}^+] = 1024.2$ . UV-Vis (in THF)  $\lambda$ , nm, ( $\epsilon$ ,  $\text{M}^{-1}\text{cm}^{-1}$ ): 345 (25000, sh), 450 (5600, sh), 570 (7000, sh), 641 (9700), 740 (5800, sh), 1060 (3600). IR  $\bar{\nu}$ ,  $\text{cm}^{-1}$ : 1947,  $\nu(\text{C}\equiv\text{C})$ ; 3280,  $\nu(\text{C}\equiv\text{C-H})$ . Electrochemistry (THF, vs.  $\text{Fc}^{+/0}$ ),  $E_{1/2}/\text{V}$ ,  $\Delta E_p/\text{mV}$ ,  $i_{\text{forward}}/i_{\text{backward}}$ : -0.21, 66, 1.1; 0.21, 67, 1.2; -1.2, 71, 1.2; -1.53, 188, 1.4.  $^1\text{H}$  NMR (300 MHz, 293 K,  $\text{CDCl}_3$ )  $\delta = -10.74$  (s, 1H,  $\text{C}\equiv\text{CH}$ ), 1.39 (d, 2H, aryl, 8.4 Hz), 2.99 (t, 4H, *ap*, 6.3 Hz), 3.90 (d, 4H, *ap*, 8.8 Hz), 5.34 (br, 4H, *ap*), 5.66 (s, 6H,  $\text{N}(\text{CH}_3)_2$ ), 5.92 (br, 4H, *ap*), 6.86 (t, 4H, *ap*, 6.9 Hz), 6.96 (d, 2H, aryl, 8.4 Hz), 7.49 (br, 8H, *ap*), 8.00 (t, 4H, *ap*, 7.5 Hz), 3.90 (d, 4H, *ap*, 6.9 Hz).

**Synthesis of  $(\text{O}\equiv\text{C})\text{Ru}_2(\text{ap})_4(\text{C}_6\text{H}_4\text{-4-NMe}_2)$  (**4**).** Carbon monoxide gas was bubbled through a 20 mL THF solution of **1** (50 mg, mmol) in a Schlenk tube. An immediate colour change from red-black to deep red was observed. Solvent was evaporated and the red solid thus obtained was dried in vacuo. Prior to collecting the solid for analysis, the tube was re-pressurized with  $\text{CO}_{(\text{g})}$ . Yield: 51 mg, 99 %. Crystals suitable for X-ray diffraction analysis were grown in a tube sealed with a slight pressure of  $\text{CO}_{(\text{g})}$  by layering hexanes over a concentrated solution of **4** in a 1:1 mixture of benzene and toluene.

Data for **4**. Anal. Found (Calcd.) for  $\text{C}_{53}\text{H}_{52}\text{N}_9\text{O}_4\text{Ru}_2$  (**4**·3H<sub>2</sub>O): C, 58.97 (58.88); H, 4.46 (4.85); N, 11.23 (11.66). Loss of the labile CO is possible during shipping and handling of the EA sample. ESI-MS ( $m/z$ , based on  $^{101}\text{Ru}$ ):  $[\text{M}]^+ = 1028.2$ ,  $[\text{M-CO}]^+ = 1000.2$ . UV-Vis (in THF)  $\lambda$ , nm, ( $\epsilon$ ,  $\text{M}^{-1}\text{cm}^{-1}$ ): 336 (33000, sh), 486 (6300), 815 (5700), 1010 (2800, sh). IR  $\bar{\nu}$ ,  $\text{cm}^{-1}$ : 1950,  $\nu(\text{C}\equiv\text{O})$ .  $\mu_{\text{eff}}$  (25°C) = 1.9 B.M. Electrochemistry (THF, vs.  $\text{Fc}^{+/0}$ ),  $E_{1/2}/\text{V}$ ,  $\Delta E_p/\text{mV}$ ,  $i_{\text{forward}}/i_{\text{backward}}$ : -0.34, 63, 1.03; 0.18, 57, 1.04; -1.39, 59, 1.00.

**Attempted reactions of CO with  $[\text{Ru}_2(\text{ap})_4]\text{X}$  ( $\text{X} = \text{Cl}$ ,  $\text{CN}$ ,  $\text{C}\equiv\text{CR}$ ,  $\text{N}_3$ ):** The  $\text{Ru}_2$  starting materials were prepared via established literature procedures through metathesis reactions of  $\text{Ru}_2(\text{ap})_4\text{Cl}$  with  $\text{KCN}$ ,<sup>3</sup>  $\text{MC}\equiv\text{CR}$  ( $\text{M} = \text{Li}$ ,  $\text{R} = \text{Ph}$ ,  $\text{C}_6\text{H}_4\text{-4-NMe}_2$ ,  $\text{M} = \text{Na}$ ,  $\text{R} = \text{H}$ )<sup>4,5</sup> and  $\text{NaN}_3$ ,<sup>6</sup> respectively. CO was bubbled through THF solutions of  $[\text{Ru}_2(\text{ap})_4]\text{X}$  for ca. 1 min at room temperature. When no color change was observed, the reaction was attempted at an elevated

temperate (50–60 °C) for ca. 1 min. No color change was observed, and ESI-MS of the reaction mixtures consistently showed no new product peaks.

## MASS SPECTROMETRY (ESI-MS)

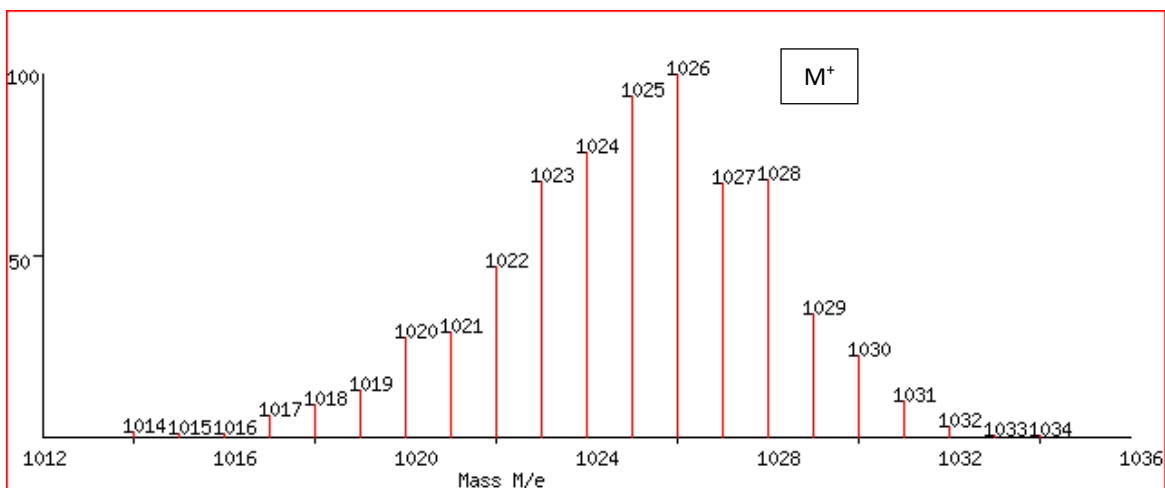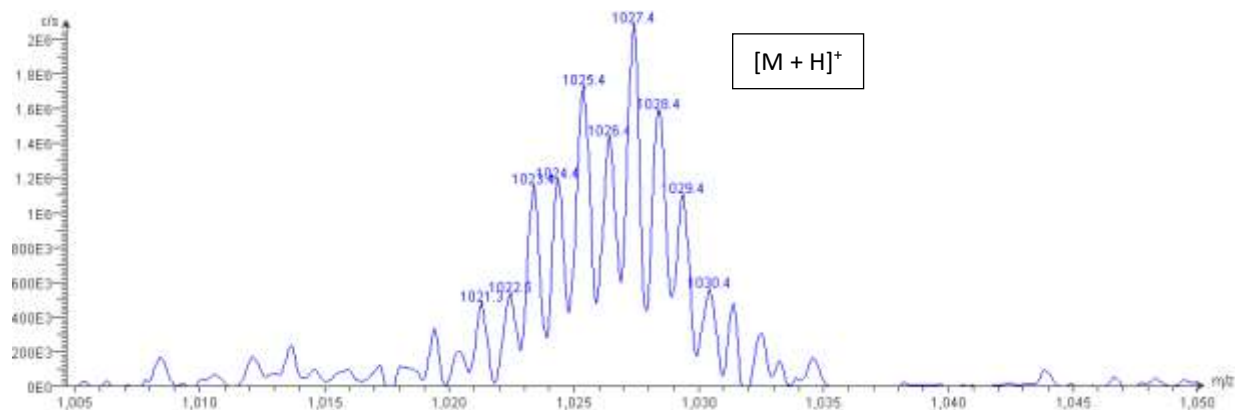

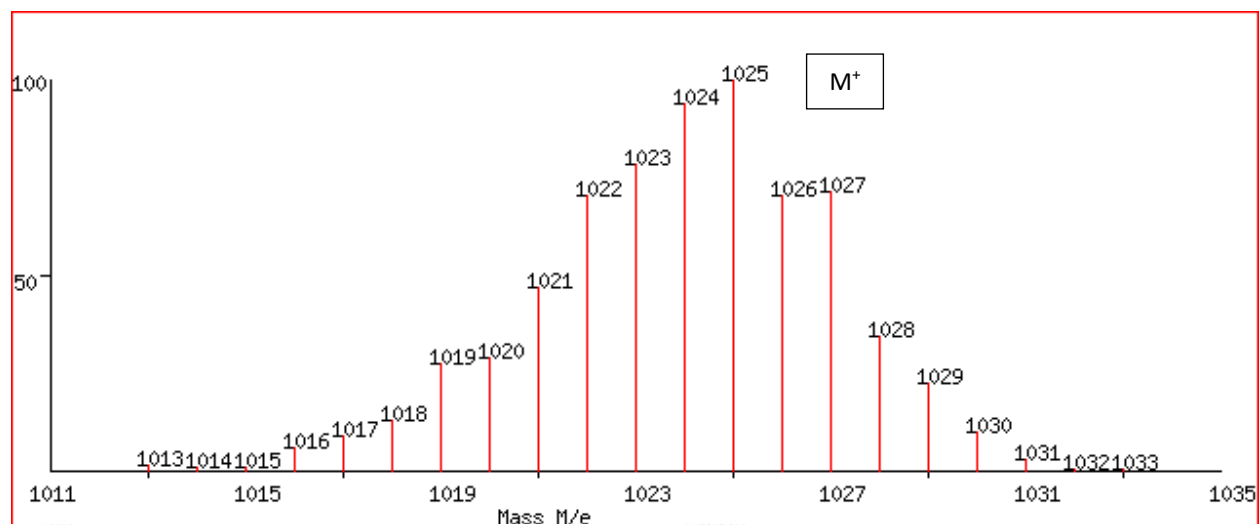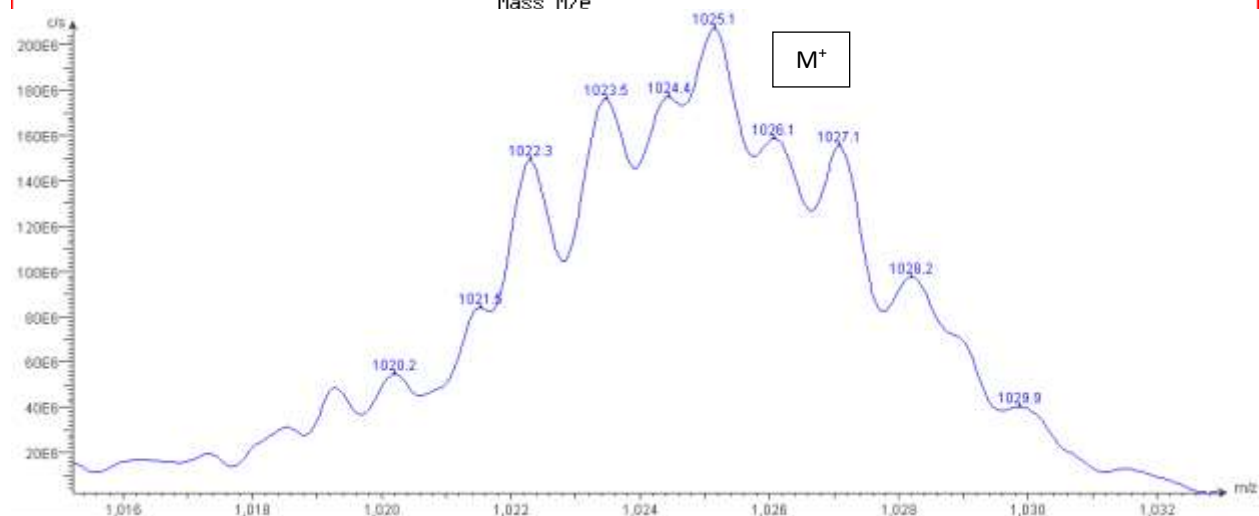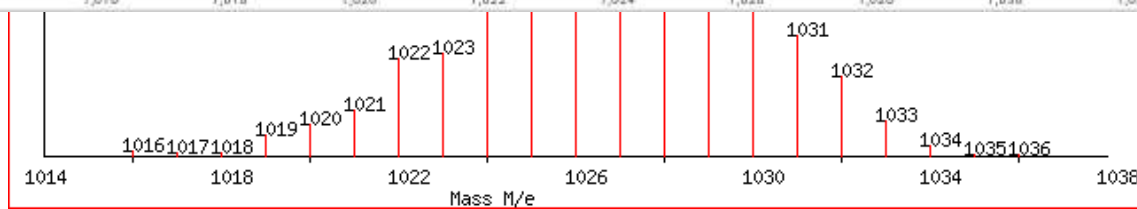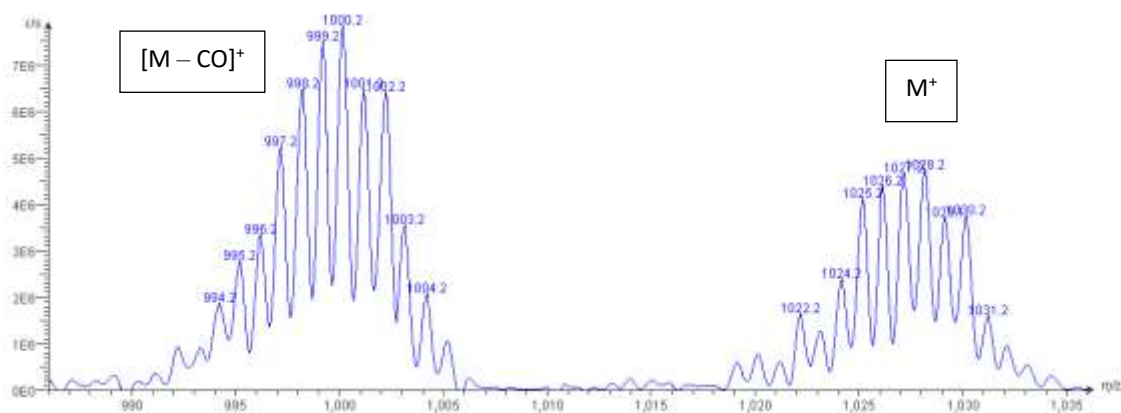

## CRYSTALLOGRAPHIC DETAILS

Single-crystal X-ray diffraction data for compounds **2–4** at 150 K were collected on a Bruker AXS D8 Quest CMOS diffractometer using Mo-K $\alpha$  radiation ( $\lambda = 0.71073$  Å). Data was collected and processed using APEX3, and the structures were solved using SHELXT suite of programs and refined to convergence on  $F^2$  and against all independent reflections by full-matrix least-squares using SHELXL.<sup>7–9</sup> All non-hydrogen atoms were refined anisotropically and hydrogen atoms were geometrically placed and allowed to ride on their parent atoms.

CCDC 2000255-2000257 contain the supplementary crystallographic data for this paper. These data can be obtained free of charge via [www.ccdc.cam.ac.uk/data\\_request/cif](http://www.ccdc.cam.ac.uk/data_request/cif), or by emailing [data\\_request@ccdc.cam.ac.uk](mailto:data_request@ccdc.cam.ac.uk), or by contacting The Cambridge Crystallographic Data Centre, 12 Union Road, Cambridge CB2 1EZ, UK; fax: +44 1223 336033.

**Table S1.** Selected Bond Lengths (Å) and Angles (deg) for Compounds **2–4**.

|                | <b>2, CN</b> | <b>3, CCH</b> | <b>4, CO</b> |
|----------------|--------------|---------------|--------------|
| Ru1–Ru2        | 2.4857(7)    | 2.4887(5)     | 2.5060(3)    |
| Ru1–C1         | 2.077(7)     | 2.058(4)      | 2.053(2)     |
| Ru2–C53        | 2.021(7)     | 2.005(4)      | 1.877(2)     |
| C53–N10/C54/O1 | 1.14(1)      | 1.181(6)      | 1.146(2)     |
| Ru2–Ru1–C1     | 157.0(2)     | 156.02(9)     | 155.61(6)    |
| Ru1–Ru2–C53    | 166.9(2)     | 166.45(9)     | 169.50(7)    |
| Ru1–N1         | 2.149(5)     | 2.132(2)      | 2.157(2)     |
| Ru1–N3         | 2.138(5)     | 2.156(2)      | 2.040(1)     |
| Ru1–N5         | 2.038(4)     | 2.038(2)      | 2.068(2)     |
| Ru1–N7         | 2.037(5)     | 2.018(3)      | 2.166(1)     |
| Ru2–N2         | 1.974(5)     | 2.007(2)      | 2.028(2)     |
| Ru2–N4         | 1.988(5)     | 1.978(3)      | 2.136(2)     |
| Ru2–N6         | 2.068(5)     | 2.080(2)      | 2.069(2)     |
| Ru2–N8         | 2.165(4)     | 2.164(2)      | 2.022(1)     |

**Table S2.** Crystallographic details for (NC)Ru<sub>2</sub>(ap)<sub>4</sub>(C<sub>6</sub>H<sub>4</sub>-4-NMe<sub>2</sub>) (**2**)

|                                                                                                                |                                                                                                                                      |
|----------------------------------------------------------------------------------------------------------------|--------------------------------------------------------------------------------------------------------------------------------------|
|                                                                                                                | AR_3_21_0m (CCDC 2000255)                                                                                                            |
| Crystal data                                                                                                   |                                                                                                                                      |
| Chemical formula                                                                                               | C <sub>61</sub> H <sub>62</sub> N <sub>10</sub> O <sub>2</sub> Ru <sub>2</sub>                                                       |
| <i>M</i> <sub>r</sub>                                                                                          | 1169.34                                                                                                                              |
| Crystal system, space group                                                                                    | Monoclinic, <i>P</i> 2 <sub>1</sub> / <i>c</i>                                                                                       |
| Temperature (K)                                                                                                | 150                                                                                                                                  |
| <i>a</i> , <i>b</i> , <i>c</i> (Å)                                                                             | 19.0728 (8), 16.6306 (7), 18.7099 (7)                                                                                                |
| β (°)                                                                                                          | 117.995 (2)                                                                                                                          |
| <i>V</i> (Å <sup>3</sup> )                                                                                     | 5240.2 (4)                                                                                                                           |
| <i>Z</i>                                                                                                       | 4                                                                                                                                    |
| Radiation type                                                                                                 | Cu <i>K</i> α                                                                                                                        |
| μ (mm <sup>-1</sup> )                                                                                          | 5.10                                                                                                                                 |
| Crystal size (mm)                                                                                              | 0.2 × 0.1 × 0.05                                                                                                                     |
| Data collection                                                                                                |                                                                                                                                      |
| Diffractometer                                                                                                 | Bruker AXS D8 Quest CMOS diffractometer                                                                                              |
| Absorption correction                                                                                          | Multi-scan<br><i>SADABS</i> 2016/2: Krause, L., Herbst-Irmer, R., Sheldrick G.M. & Stalke D. (2015). <i>J. Appl. Cryst.</i> 48 3-10. |
| <i>T</i> <sub>min</sub> , <i>T</i> <sub>max</sub>                                                              | 0.477, 0.754                                                                                                                         |
| No. of measured, independent and observed [ <i>I</i> > 2σ( <i>I</i> )] reflections                             | 35321, 10759, 7585                                                                                                                   |
| <i>R</i> <sub>int</sub>                                                                                        | 0.091                                                                                                                                |
| (sin θ/λ) <sub>max</sub> (Å <sup>-1</sup> )                                                                    | 0.640                                                                                                                                |
| Refinement                                                                                                     |                                                                                                                                      |
| <i>R</i> [ <i>F</i> <sup>2</sup> > 2σ( <i>F</i> <sup>2</sup> )], <i>wR</i> ( <i>F</i> <sup>2</sup> ), <i>S</i> | 0.061, 0.174, 1.07                                                                                                                   |
| No. of reflections                                                                                             | 10759                                                                                                                                |
| No. of parameters                                                                                              | 678                                                                                                                                  |
| H-atom treatment                                                                                               | H-atom parameters constrained                                                                                                        |
| Δ <sub>max</sub> , Δ <sub>min</sub> (e Å <sup>-3</sup> )                                                       | 1.39, -1.37                                                                                                                          |



**Table S3.** Crystallographic details for (HCC)Ru<sub>2</sub>(ap)<sub>4</sub>(C<sub>6</sub>H<sub>4</sub>-4-NMe<sub>2</sub>) (**3**)

|                                                                                                                |                                                                                                                        |
|----------------------------------------------------------------------------------------------------------------|------------------------------------------------------------------------------------------------------------------------|
|                                                                                                                | AR_3_173_0m (CCDC 2000256)                                                                                             |
| Crystal data                                                                                                   |                                                                                                                        |
| Chemical formula                                                                                               | C <sub>62</sub> H <sub>63</sub> N <sub>9</sub> O <sub>2</sub> Ru <sub>2</sub>                                          |
| <i>M<sub>r</sub></i>                                                                                           | 1168.35                                                                                                                |
| Crystal system, space group                                                                                    | Triclinic, <i>P</i> $\bar{1}$                                                                                          |
| Temperature (K)                                                                                                | 150                                                                                                                    |
| <i>a</i> , <i>b</i> , <i>c</i> (Å)                                                                             | 11.3227 (5), 14.1697 (6), 17.6704 (7)                                                                                  |
| $\alpha$ , $\beta$ , $\gamma$ (°)                                                                              | 109.063 (2), 102.115 (3), 92.949 (3)                                                                                   |
| <i>V</i> (Å <sup>3</sup> )                                                                                     | 2597.70 (19)                                                                                                           |
| <i>Z</i>                                                                                                       | 2                                                                                                                      |
| Radiation type                                                                                                 | Cu <i>K</i> α                                                                                                          |
| $\mu$ (mm <sup>-1</sup> )                                                                                      | 5.14                                                                                                                   |
| Crystal size (mm)                                                                                              | 0.20 × 0.15 × 0.14                                                                                                     |
| Data collection                                                                                                |                                                                                                                        |
| Diffractometer                                                                                                 | Bruker AXS D8 Quest CMOS diffractometer                                                                                |
| Absorption correction                                                                                          | Multi-scan<br>SADABS 2016/2: Krause, L., Herbst-Irmer, R., Sheldrick G.M. & Stalke D. (2015). J. Appl. Cryst. 48 3-10. |
| <i>T</i> <sub>min</sub> , <i>T</i> <sub>max</sub>                                                              | 0.530, 0.753                                                                                                           |
| No. of measured, independent and observed [ <i>I</i> > 2σ( <i>I</i> )] reflections                             | 29336, 9759, 8521                                                                                                      |
| <i>R</i> <sub>int</sub>                                                                                        | 0.057                                                                                                                  |
| (sin θ/λ) <sub>max</sub> (Å <sup>-1</sup> )                                                                    | 0.610                                                                                                                  |
| Refinement                                                                                                     |                                                                                                                        |
| <i>R</i> [ <i>F</i> <sup>2</sup> > 2σ( <i>F</i> <sup>2</sup> )], <i>wR</i> ( <i>F</i> <sup>2</sup> ), <i>S</i> | 0.040, 0.114, 1.01                                                                                                     |
| No. of reflections                                                                                             | 9759                                                                                                                   |
| No. of parameters                                                                                              | 724                                                                                                                    |
| No. of restraints                                                                                              | 216                                                                                                                    |
| H-atom treatment                                                                                               | H-atom parameters constrained                                                                                          |
| Δ <sub>max</sub> , Δ <sub>min</sub> (e Å <sup>-3</sup> )                                                       | 1.24, -1.30                                                                                                            |

**Table S4.** Crystallographic details for (OC)Ru<sub>2</sub>(ap)<sub>4</sub>(C<sub>6</sub>H<sub>4</sub>-4-NMe<sub>2</sub>) (**4**)

|                                                                                                                |                                                                                                                       |
|----------------------------------------------------------------------------------------------------------------|-----------------------------------------------------------------------------------------------------------------------|
|                                                                                                                | AR_3_99_0m (CCDC 2000257)                                                                                             |
| Crystal data                                                                                                   |                                                                                                                       |
| Chemical formula                                                                                               | C <sub>59.39</sub> H <sub>52.77</sub> N <sub>9</sub> ORu <sub>2</sub>                                                 |
| <i>M</i> <sub>r</sub>                                                                                          | 1110.66                                                                                                               |
| Crystal system, space group                                                                                    | Triclinic, <i>P</i> $\bar{1}$                                                                                         |
| Temperature (K)                                                                                                | 150                                                                                                                   |
| <i>a</i> , <i>b</i> , <i>c</i> (Å)                                                                             | 12.5822 (9), 12.8242 (9), 17.5440 (11)                                                                                |
| $\alpha$ , $\beta$ , $\gamma$ (°)                                                                              | 71.387 (3), 73.114 (2), 75.340 (3)                                                                                    |
| <i>V</i> (Å <sup>3</sup> )                                                                                     | 2526.7 (3)                                                                                                            |
| <i>Z</i>                                                                                                       | 2                                                                                                                     |
| Radiation type                                                                                                 | Mo <i>K</i> α                                                                                                         |
| μ (mm <sup>-1</sup> )                                                                                          | 0.65                                                                                                                  |
| Crystal size (mm)                                                                                              | 0.70 × 0.30 × 0.30                                                                                                    |
| Data collection                                                                                                |                                                                                                                       |
| Diffractometer                                                                                                 | Bruker AXS D8 Quest CMOS diffractometer                                                                               |
| Absorption correction                                                                                          | Multi-scan<br>SADABS 2016/2: Krause, L., Herbst-Irmer, R., Sheldrick G.M. & Stalke D., J. Appl. Cryst. 48 (2015) 3-10 |
| <i>T</i> <sub>min</sub> , <i>T</i> <sub>max</sub>                                                              | 0.674, 0.746                                                                                                          |
| No. of measured, independent and observed [ <i>I</i> > 2σ( <i>I</i> )] reflections                             | 83101, 16824, 13493                                                                                                   |
| <i>R</i> <sub>int</sub>                                                                                        | 0.036                                                                                                                 |
| (sin θ/λ) <sub>max</sub> (Å <sup>-1</sup> )                                                                    | 0.737                                                                                                                 |
| Refinement                                                                                                     |                                                                                                                       |
| <i>R</i> [ <i>F</i> <sup>2</sup> > 2σ( <i>F</i> <sup>2</sup> )], <i>wR</i> ( <i>F</i> <sup>2</sup> ), <i>S</i> | 0.034, 0.075, 1.08                                                                                                    |
| No. of reflections                                                                                             | 16824                                                                                                                 |
| No. of parameters                                                                                              | 707                                                                                                                   |
| No. of restraints                                                                                              | 204                                                                                                                   |
| H-atom treatment                                                                                               | H-atom parameters constrained                                                                                         |
| Δ <sub>max</sub> , Δ <sub>min</sub> (e Å <sup>-3</sup> )                                                       | 2.81, -1.13                                                                                                           |

# <sup>1</sup>H NMR SPECTROSCOPY

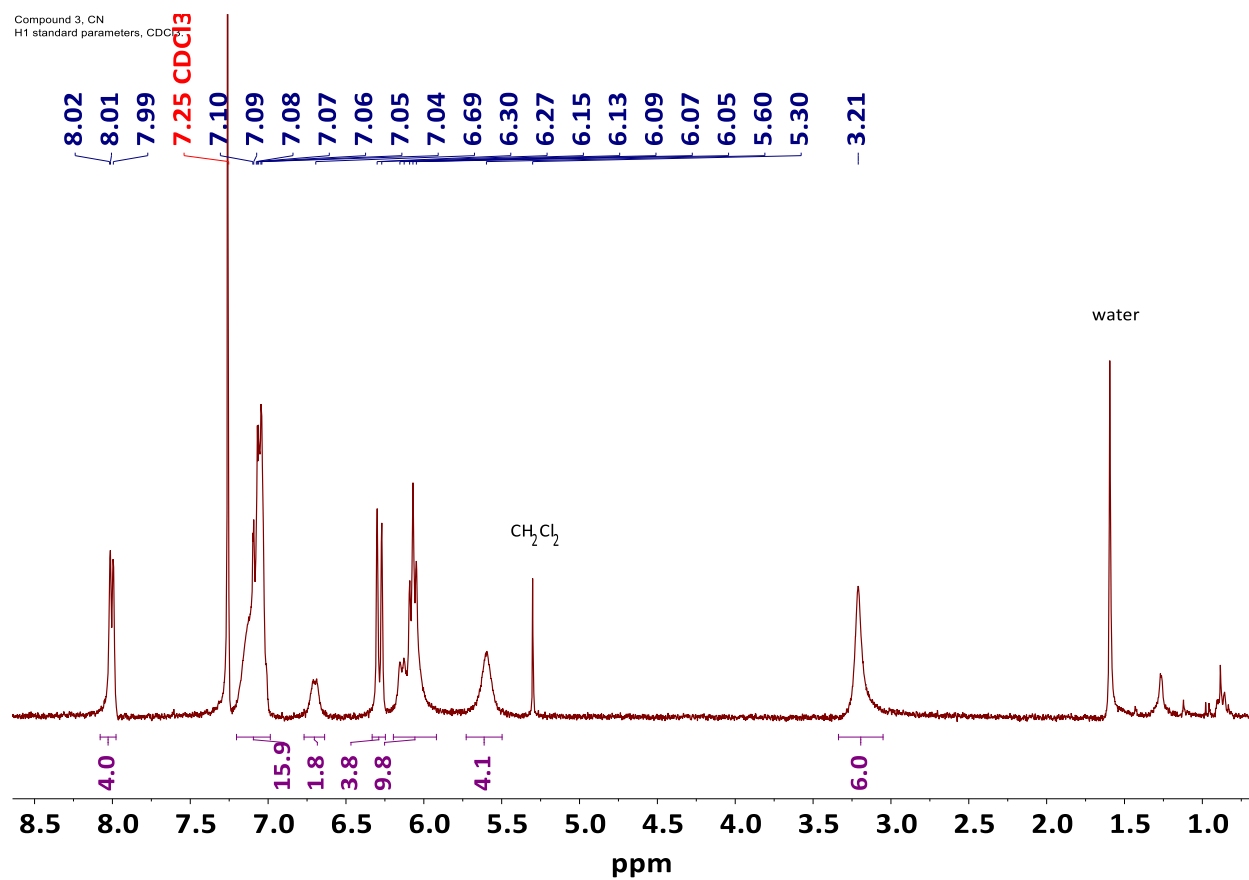

**Figure S4.** <sup>1</sup>H NMR spectrum of **2** in CDCl<sub>3</sub> at 293 K.

Compound 4, CCH\_1  
H1 standard parameters, CDCl3.

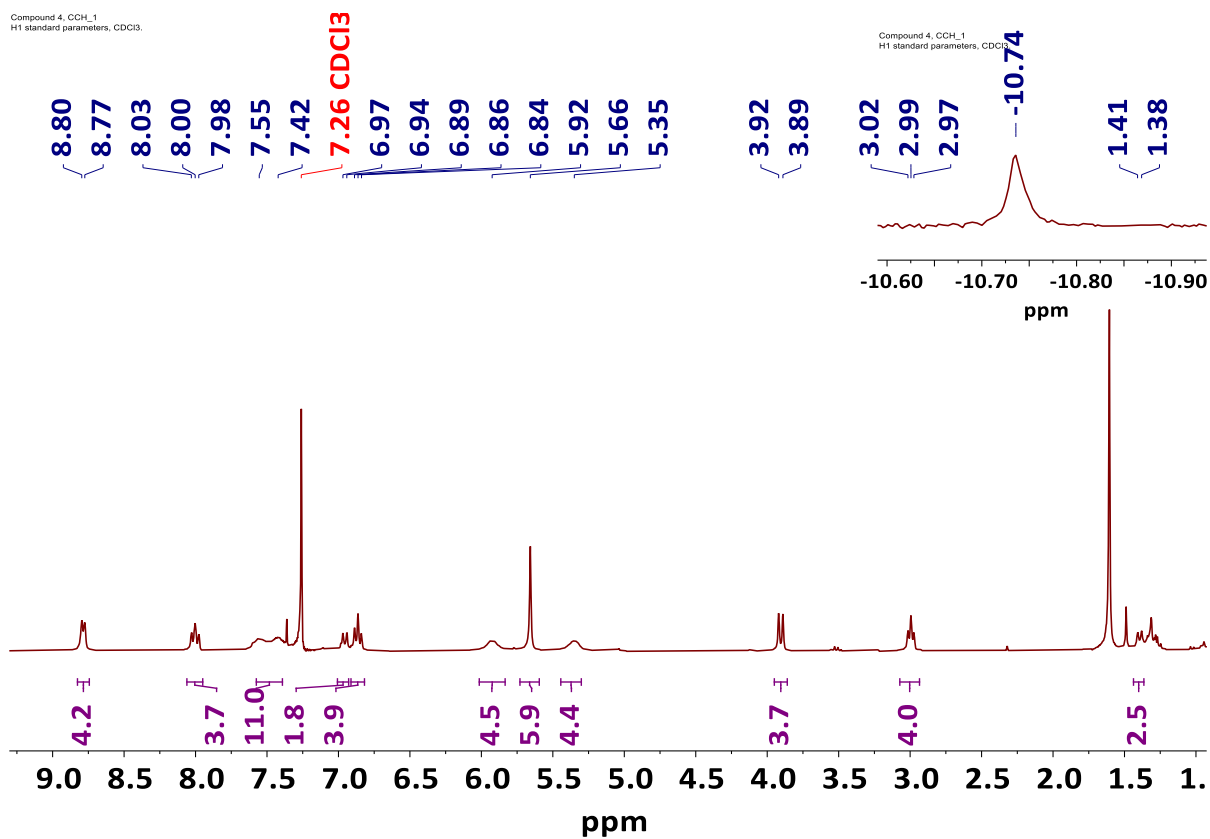

**Figure S5.** <sup>1</sup>H NMR spectrum of **3** in CDCl<sub>3</sub> at 293 K.

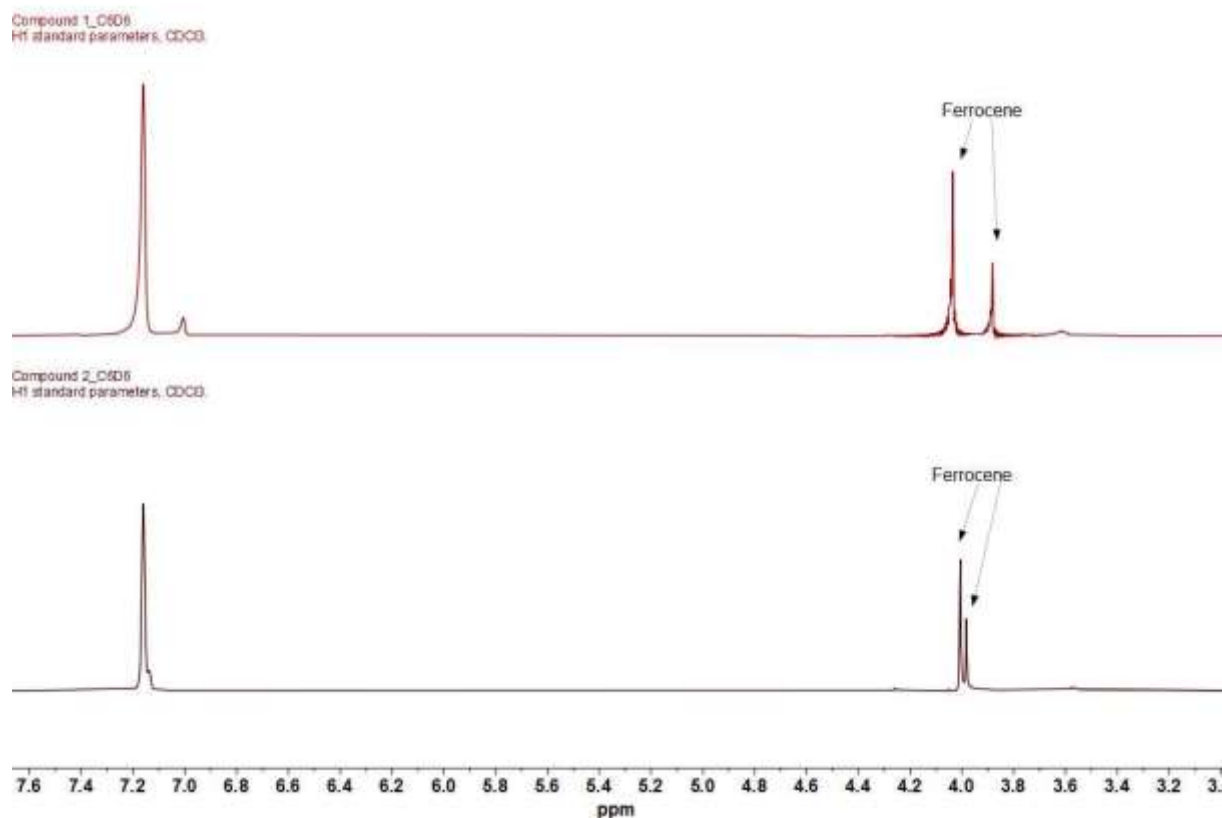

**Figure S6.**  $^1\text{H}$  NMR spectra of **1** (top) and **4** (bottom) in  $\text{C}_6\text{D}_6$  at 293 K, containing capillary inserts for Evans method<sup>10</sup> magnetometry.

$$\chi_m = \frac{3000 \times \Delta f \times 300}{F \times 4\pi \times [\text{Ru}_2]}$$

(where  $F$  = frequency of the spectrometer in Hz,  $\Delta f$  = difference in chemical shifts of Fc peak in ppm,  $[\text{Ru}_2]$  = concentration of the diruthenium species in  $\text{mol.L}^{-1}$ )

Using the above equation and applying appropriate diamagnetic corrections,<sup>11</sup>  $\mu_{\text{eff}}$  for compound **1** and **4** were calculated:

$$\mu_{\text{eff},1} = 4.1 \mu_B; \mu_{\text{eff},4} = 1.9 \mu_B.$$

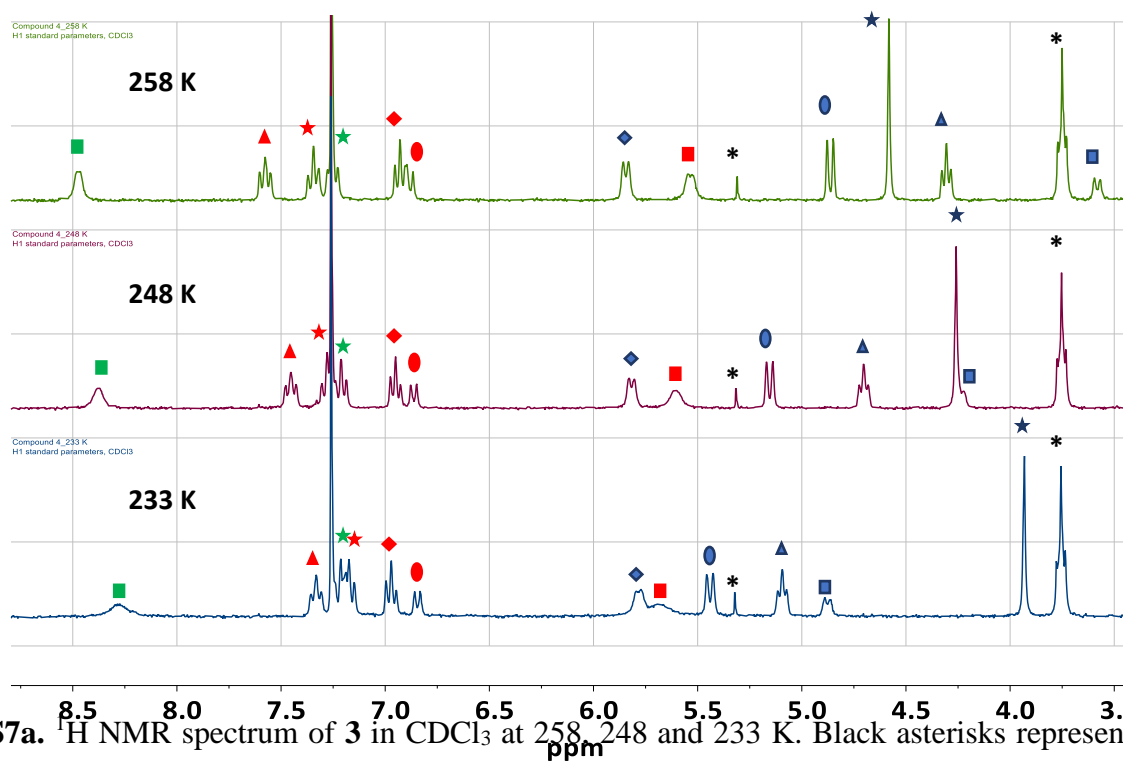

**Figure S7a.**  $^1\text{H}$  NMR spectrum of **3** in  $\text{CDCl}_3$  at 258, 248 and 233 K. Black asterisks represent solvent impurity peaks (THF and  $\text{CH}_2\text{Cl}_2$ ). Sets of equivalent peaks are denoted by matching shapes and colors. See Figure S5 for the corresponding spectrum at 293 K.

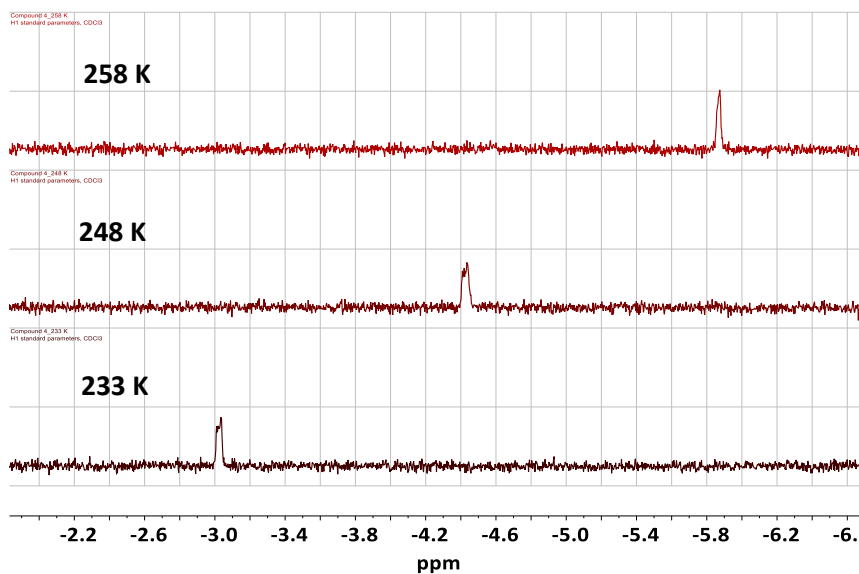

**Figure S7b.**  $^1\text{H}$  NMR spectrum of **3** in  $\text{CDCl}_3$  at 258, 248 and 233 K, shown here are the peaks corresponding to the acetylide ( $\text{C}\equiv\text{C}-\text{H}$ ) proton.

It is clear from the above VT-NMR spectra that the chemical shifts for compound **3** are temperature-dependent. As the temperature is decreased, all the peaks trend toward their diamagnetic reference values. We thus hypothesize that compound **3** exists in a singlet ground state ( $\lim_{T \rightarrow 0}(S) = 0$ ) but has a thermally accessible low-lying triplet state ( $S = 1$ ). This can be modelled as the result of a Boltzmann distribution between the states according to equation EQ1.<sup>12</sup>

$$\delta(T) = a + \left(\frac{1}{T}\right) \frac{b \cdot e^{\frac{c}{RT}}}{1 + 3e^{\frac{c}{RT}}} \dots EQ1$$

$a = \delta_0$ , the diamagnetic reference value for the chemical shift of the proton considered,

$b$  = a parameter that is related to the Hyperfine coupling constant,

$c = \Delta E_{s-t} = E_s - E_t$ , the energy difference between the singlet ground state and the triplet excited state.

The parametrized equation (EQ1) was used to analyze the chemical shifts of the  $C \equiv C-H$ ,  $N(CH_3)_2$  and axial aryl(**CH**) protons (Figures S8a–c). Accordingly, the singlet-triplet energy gap was found to be  $|2J| = 972.3 \pm 146.9 \text{ cm}^{-1}$  ( $2.78 \pm 0.42 \text{ kcal/mol}$ ).

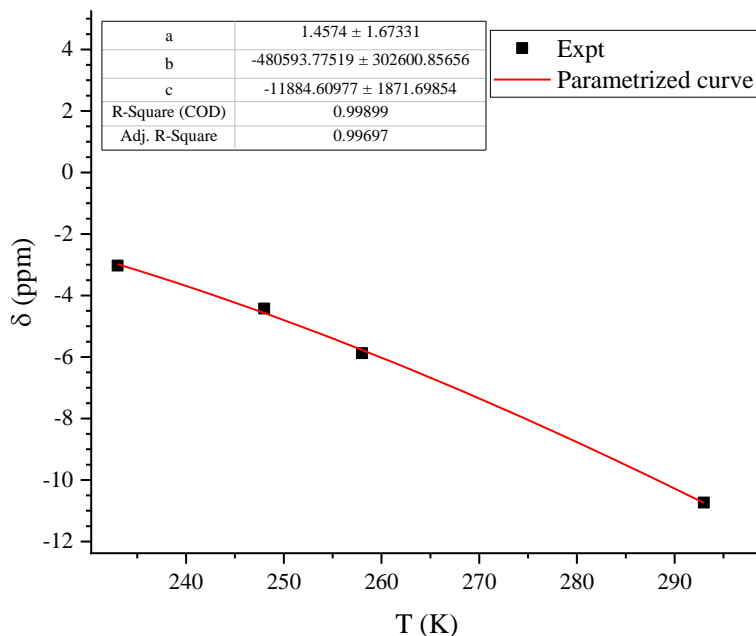

**Figure S8a.** Experimental VT-NMR chemical shift data for  $\delta(C \equiv C-H)$  modelled according to the parametrized equation EQ1.

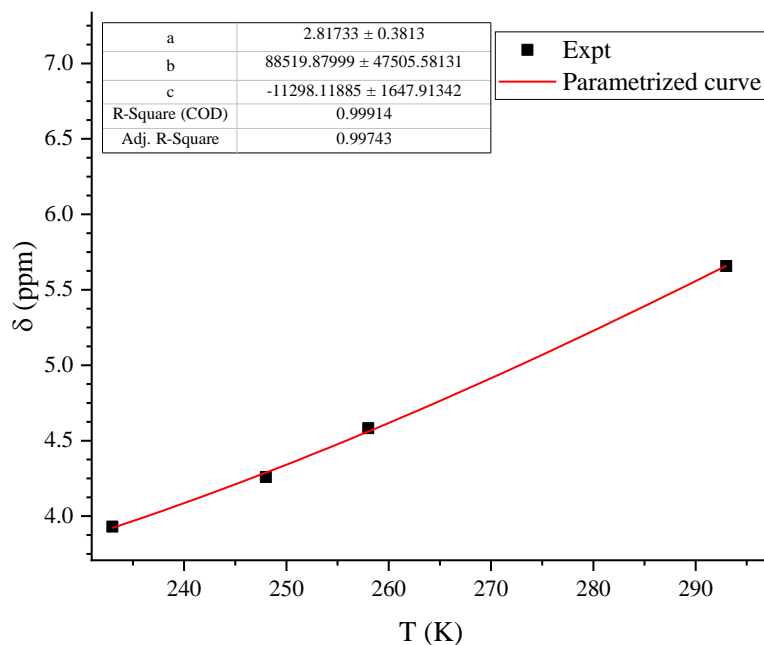

**Figure S8b.** Experimental VT-NMR chemical shift data for  $\delta(\text{N}-(\text{CH}_3)_2)$  modelled according to the parametrized equation EQ1.

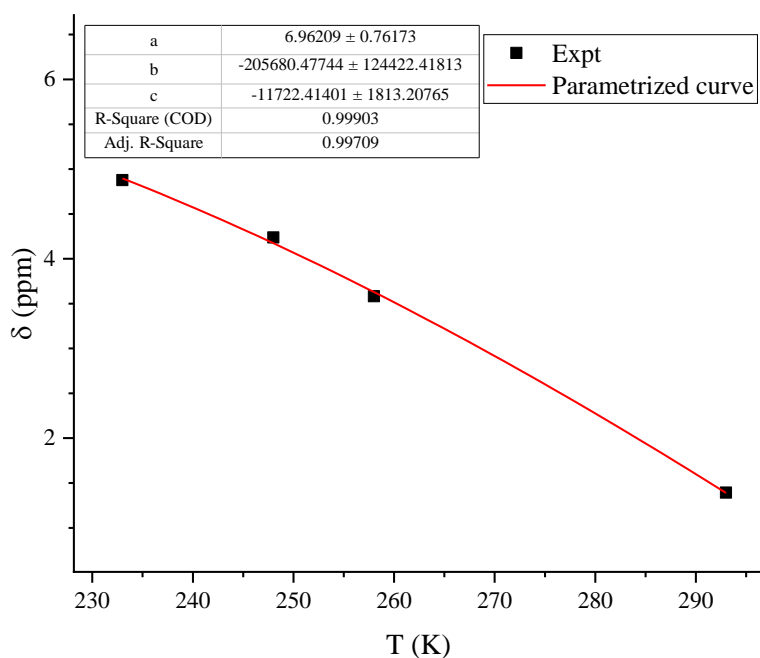

**Figure S8c.** Experimental VT-NMR chemical shift data for  $\delta(\text{Aryl}(\text{CH}))$  modelled according to the parametrized equation EQ1.



## ELECTROCHEMISTRY

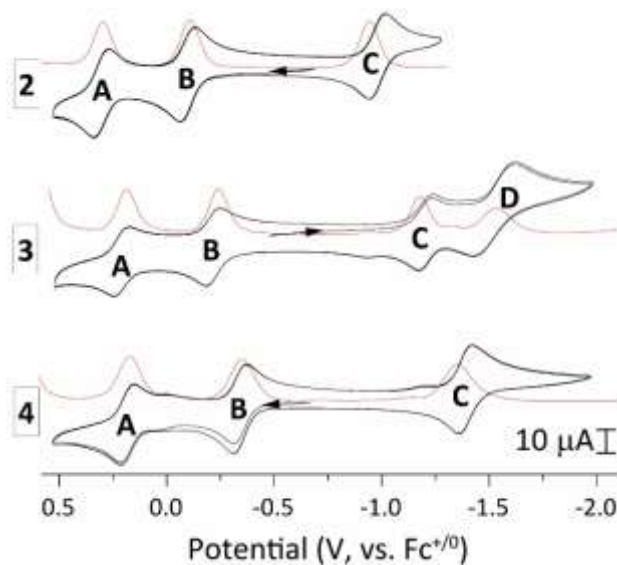

**Figure S9.** Cyclic (black) and differential pulse (red) voltammograms of compounds **2–4** recorded in 0.2 M TBAPF<sub>6</sub> THF. [Ru<sub>2</sub>] is always ca. 1.0 mM.

**Table S5.** Redox potentials (V, versus Fc<sup>+/0</sup>) for (Y)[Ru<sub>2</sub>(ap)<sub>4</sub>](C<sub>6</sub>H<sub>4</sub>-4-NMe<sub>2</sub>)

| Y                 | E <sub>1/2</sub> (A) | E <sub>1/2</sub> (B)                      | E <sub>1/2</sub> (C)                      | E <sub>1/2</sub> (D) |
|-------------------|----------------------|-------------------------------------------|-------------------------------------------|----------------------|
| – ( <b>1</b> )    | 0.12                 | –0.27 (Ru <sub>2</sub> <sup>6+/5+</sup> ) | –1.62 (Ru <sub>2</sub> <sup>5+/4+</sup> ) | –                    |
| CN ( <b>2</b> )   | 0.30                 | –0.11 (Ru <sub>2</sub> <sup>7+/6+</sup> ) | –0.98 (Ru <sub>2</sub> <sup>6+/5+</sup> ) | –                    |
| C≡CH ( <b>3</b> ) | 0.21                 | –0.21 (Ru <sub>2</sub> <sup>7+/6+</sup> ) | –1.2 (Ru <sub>2</sub> <sup>6+/5+</sup> )  | –1.53                |
| CO ( <b>4</b> )   | 0.18                 | –0.34 (Ru <sub>2</sub> <sup>6+/5+</sup> ) | –1.39 (Ru <sub>2</sub> <sup>5+/4+</sup> ) | –                    |

**Table S6.** Voltammetry and IR spectroscopy of Ru<sub>2</sub>–CO complexes in the literature

| Compound                                                     | Oxidation state               | E <sub>1/2</sub> (V vs. Fc <sup>+0</sup> ) |                                  | ν <sub>CO</sub> , cm <sup>-1</sup> | Reference        |
|--------------------------------------------------------------|-------------------------------|--------------------------------------------|----------------------------------|------------------------------------|------------------|
|                                                              |                               | Ru <sub>2</sub> <sup>6+/5+</sup>           | Ru <sub>2</sub> <sup>5+/4+</sup> |                                    |                  |
| [Ru <sub>2</sub> (dpb) <sub>4</sub> (CO)] <sup>+</sup>       | Ru <sub>2</sub> <sup>5+</sup> | 0.48                                       | −0.82                            | 2013                               | 13               |
| [Ru <sub>2</sub> (DPhF) <sub>4</sub> (CO)] <sup>+</sup>      |                               | -                                          | -                                | 2019                               | 14               |
| [Ru <sub>2</sub> (DPhF) <sub>3</sub> (OAc)(CO)] <sup>+</sup> |                               | 0.31                                       | −0.59                            | 2016                               | 15               |
| <b>[(CO)Ru<sub>2</sub>(ap)<sub>4</sub>Ar]</b>                |                               | <b>−0.34</b>                               | <b>−1.39</b>                     | <b>1950</b>                        | <b>This work</b> |
| Ru <sub>2</sub> (dpb) <sub>4</sub> (CO)                      | Ru <sub>2</sub> <sup>4+</sup> | 0.59                                       | −0.37                            | 1924                               | 13               |
| Ru <sub>2</sub> (DPhF) <sub>4</sub> (CO)                     |                               | -                                          | −0.20                            | 1929                               | 14               |
| [Ru <sub>2</sub> (dpb) <sub>4</sub> (CO)] <sup>−</sup>       | Ru <sub>2</sub> <sup>3+</sup> | -                                          | -                                | 1834                               | 13               |
| [Ru <sub>2</sub> (DPhF) <sub>4</sub> (CO)] <sup>−</sup>      |                               | -                                          | -                                | 1840                               | 14               |

## DISSOCIATION OF CO FROM (4)

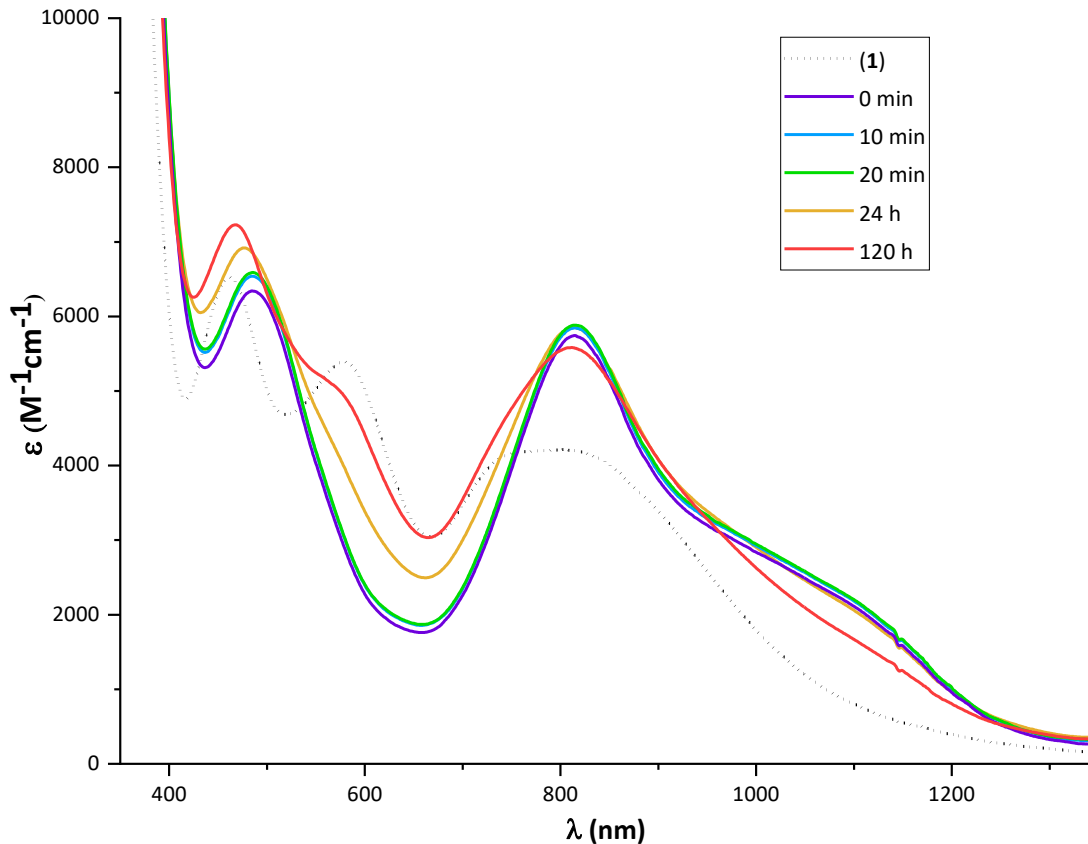

**Figure S10.** UV-Vis/NIR spectrum of **1** (black dotted line), **4** freshly prepared by exposure of **1** to CO, and slow dissociation of CO upon exposure to air for varying lengths of time.

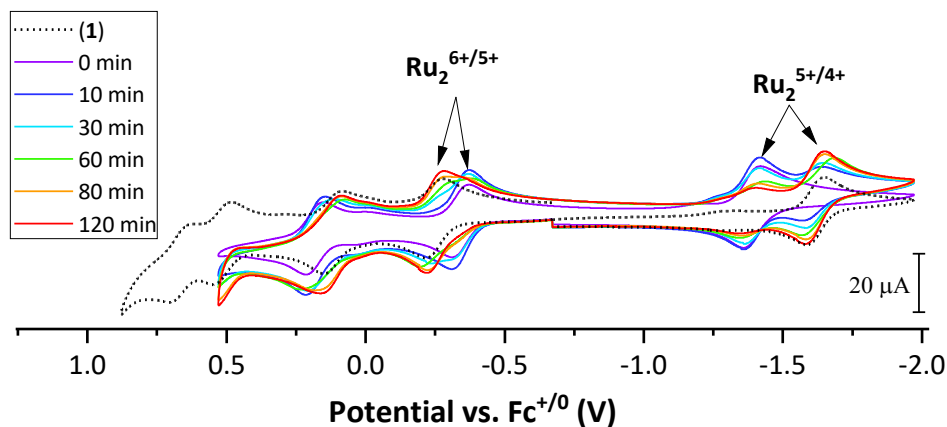

**Figure S11.** Cyclic voltammogram of compound **1** under  $N_2$  (black dotted line), **4** freshly prepared by purging the electrochemical cell with CO (violet line, 0 min), and subsequent scans recorded after the electrochemical cell was purged with  $N_2$  for varying lengths of time.

## SQUID MAGNETOMETRY

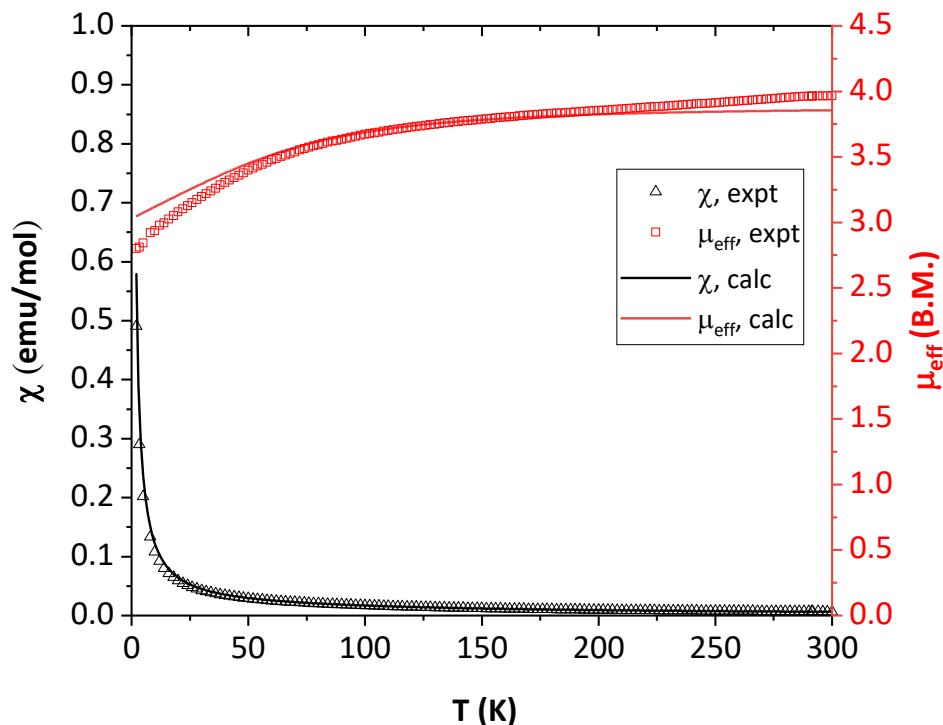

**Figure S12.** SQUID magnetometry data for **1** from 2 K – 300 K. Open symbols denote experimental values; solid lines denote simulated curves.

Compound **1**, which has a quartet ground state exhibits a temperature-dependent magnetic susceptibility varying over the range of 2 K – 300 K that can be fit according to the following equations:

$$\chi_{\parallel} = \frac{N_A g_{\parallel}^2 \beta^2}{k_B T} \cdot \left\{ \frac{1 + 9e^{-\frac{D}{k_B T}}}{4 \left( 1 + e^{-\frac{D}{k_B T}} \right)} \right\} \dots EQ2$$

$$\chi_{\perp} = \frac{N_A g_{\perp}^2 \beta^2}{k_B T} \cdot \left\{ \frac{4 + \left( \frac{6k_B T}{D} \right) \left( 1 - e^{-\frac{D}{k_B T}} \right)}{4 \left( 1 + e^{-\frac{D}{k_B T}} \right)} \right\} \dots EQ3$$

$$\chi_{total} = \frac{1}{3} (\chi_{\parallel} + 2 \cdot \chi_{\perp}) \dots EQ4$$

Where  $N_A$  = Avogadro's number,  $k_B$  = Boltzmann constant,  $T$  = temperature,  $D$  = Zero Field Splitting (ZFS) parameter,  $\beta$  = Bohr Magnetron.

The curve in Figure S12 was simulated for  $D = 152 \text{ cm}^{-1}$ ,  $g_{\parallel} = 1.9500$ ,  $g_{\perp} = 2.0265$ .

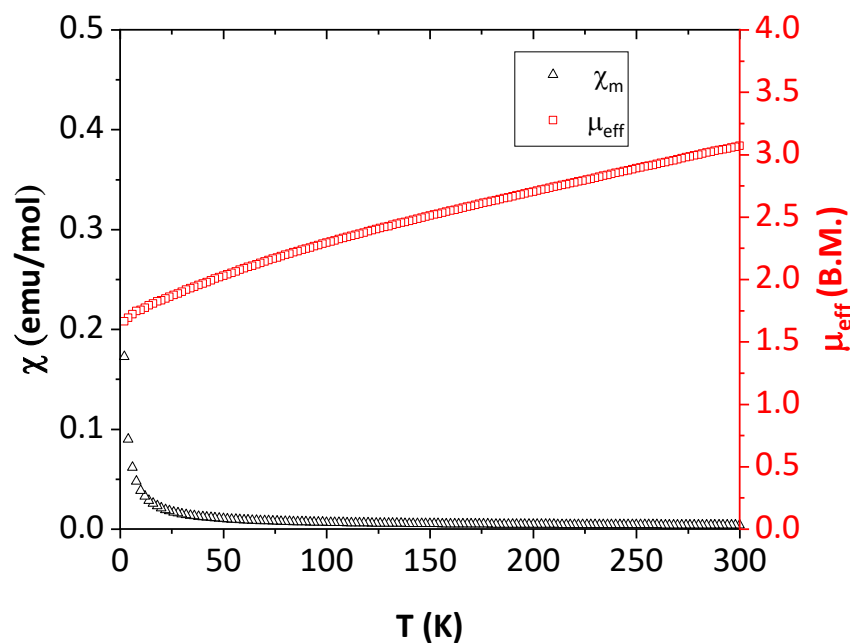

**Figure S13.** SQUID magnetometry data for **4** from 2 K – 300 K.

For a doublet ground state, the value of  $\chi T$ , and hence  $\mu_{\text{eff}}$ , is expected to be invariant of temperature. However, the lability of CO and the associated change in spin-state complicates the issue. Ideally, the SQUID sample holder would be hermetically sealed under a magnetically inert atmosphere. But in the event of leaks wherein the compound gets inadvertently exposed to the low-pressure of the vacuum that is operative during measurements, CO can dissociate from the complex. All attempts to fit the data as a physical mixture of compound **4** ( $S = 1/2$ ) with compound **1** ( $S = 3/2$ ) as an impurity failed.

Upon closer inspection, it can be seen that with CO as a labile axial ligand, this system closely resembles  $[\text{Ru}_2(\text{DPhF})_3(\text{OAc})(\text{H}_2\text{O})]\text{BF}_4$ ,<sup>16</sup> which has labile water molecules at the axial positions. This compound displays a very similar magnetic behavior between 2 K – 300 K, which has been explained via a quantum mechanical spin admixture that takes place through spin-orbit coupling. This phenomenon could be operative in the case of compound **4** as well.

## COMPUTATIONAL DETAILS

All Density Functional Theory (DFT) calculations were carried out using Gaussian16.<sup>17</sup> Geometry optimizations of **4** based on the corresponding crystal structure were done using the spin-unrestricted formalism with the B3LYP<sup>18-21</sup> and BP86<sup>22</sup> functionals. Minima were confirmed through frequency analysis. The output from B3LYP was found to be closer to experimentally determined metrical parameters. Table S6 lists the comparison between experimental and DFT-optimized structures (**4** and **4'**, respectively). Time-dependent DFT calculations (TD-DFT) were also performed on the optimized structure **4'** using both the B3LYP and BP86 functionals; BP86 gave large deviations from the experimental UV-Vis spectrum compared to B3LYP. All subsequent analyses, therefore, were performed with the B3LYP functional, basis sets def2-TZVP (with ECP) for Ru atoms and def2-SVP for C, H, O and N atoms,<sup>23,24</sup> and the polarizable continuum solvent model (CPCM) for tetrahydrofuran.

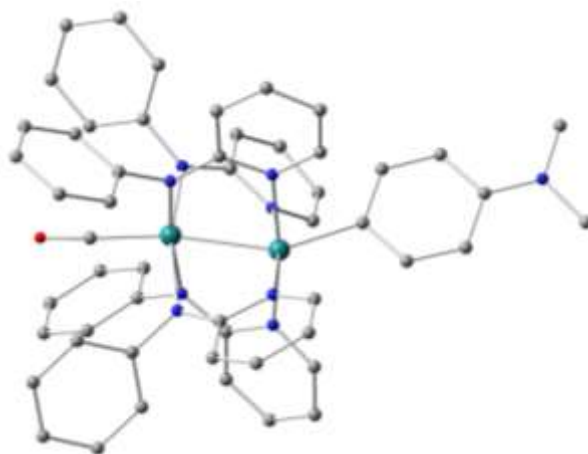

**Figure S14.** DFT-optimized structure (**4'**) derived from the single crystal X-ray diffraction data of compound **4**.

**Table S7.** Selected experimental and DFT-optimized metrical parameters of **4** and **4'**.

|             | <b>4 (XRD)</b> | <b>4' (DFT, B3LYP)</b> | <b>4' (DFT, BP86)</b> |
|-------------|----------------|------------------------|-----------------------|
| Ru1–Ru2     | 2.5060(3)      | 2.52113                | 2.54806               |
| Ru1–C1      | 2.053(2)       | 2.02168                | 2.03964               |
| Ru2–C53     | 1.877(2)       | 1.85911                | 1.84910               |
| C53–O1      | 1.146(2)       | 1.15457                | 1.17423               |
| Ru2–Ru1–C1  | 155.61(6)      | 150.41711              | 151.40244             |
| Ru1–Ru2–C53 | 169.50(7)      | 170.60788              | 169.55364             |

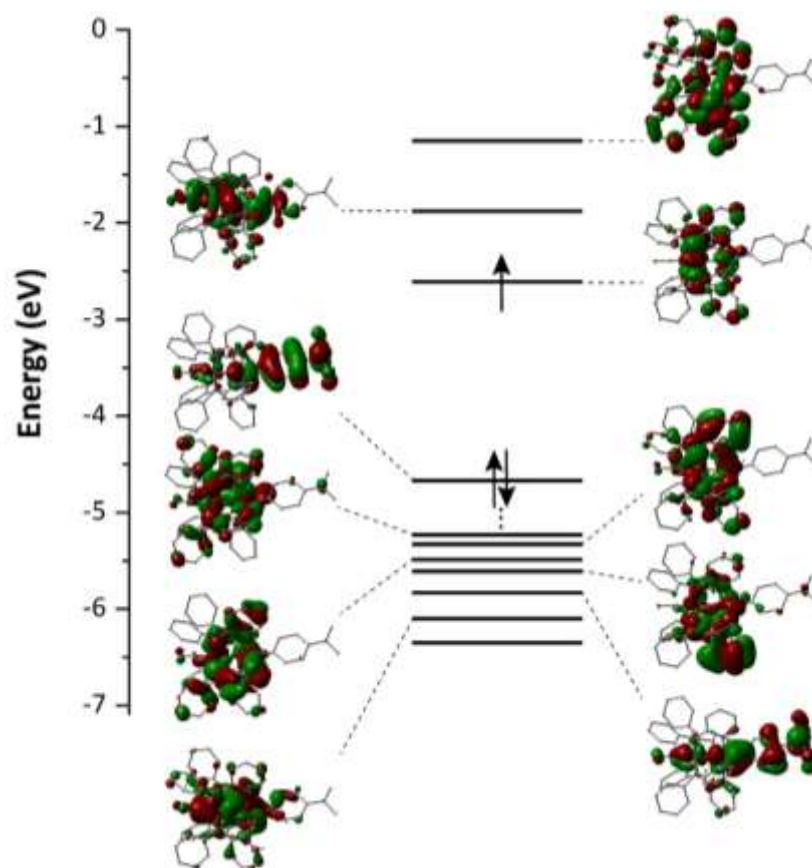

**Figure S15.** Frontier Molecular Orbitals of **4'** (energies in eV) represented at isovalue =  $|0.02|$

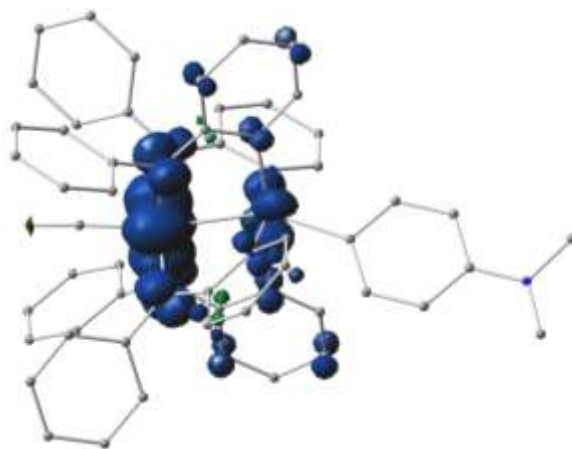

**Figure S16.** Net unpaired electron density calculated for **4'**, represented at  $|\text{isovalue}| = 0.003$ . The unpaired electron is predominantly localized on the  $\delta^*$  orbital, per the electronic configuration described in the text (also see Figure S15, SOMO)

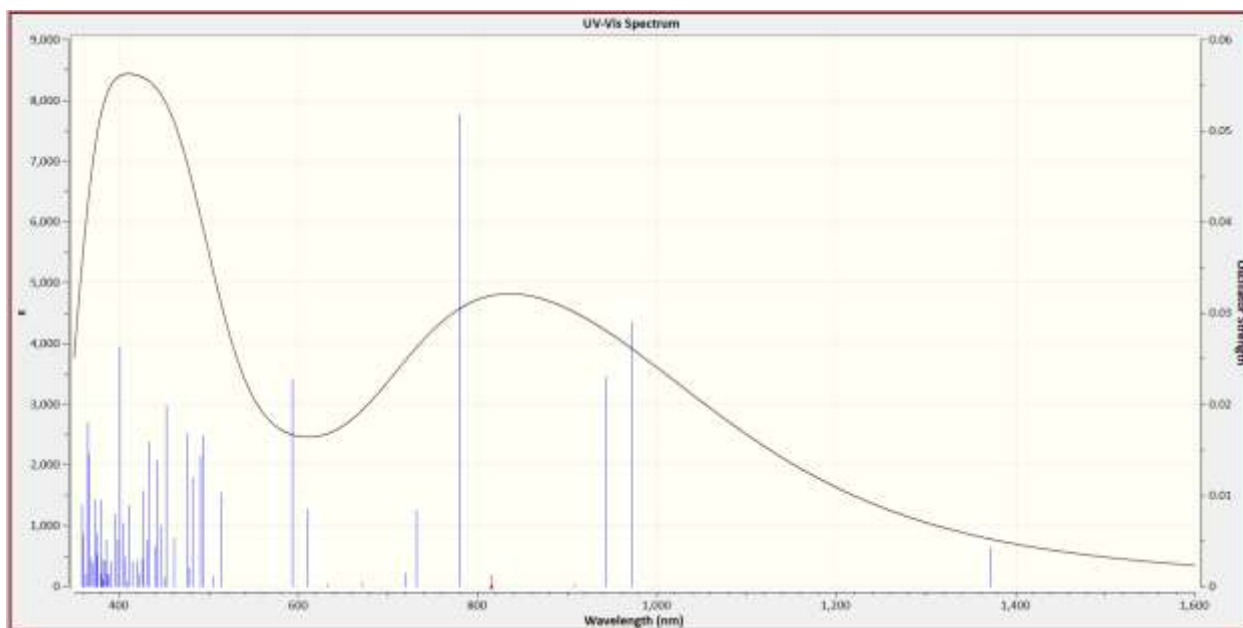

**Figure S17.** TD-DFT spectrum of DFT-optimized **4'** (compare with experimental spectrum in Figure S10)

## REFERENCES:

- (1) Zou, G.; Alvarez, J. C.; Ren, T. Ru-s-alkynyl compounds of tetraanilinopyridinato-diruthenium(II,III) core: Synthesis and structural characterization. *J. Organomet. Chem.* **2000**, 596, 152-158.
- (2) Raghavan, A.; Mash, B. L.; Ren, T. Forging Ru-C sp<sup>2</sup> Bonds in Paddlewheel Complexes Using the Lithium-Halogen Exchange Reaction. *Inorg. Chem.* **2019**, 58, 2618-2626.
- (3) Bear, J. L.; Chen, W. Z.; Han, B.; Huang, S.; Wang, L. L.; Thuriere, A.; Van Caemelbecke, E.; Kadish, K. M.; Ren, T. Cyanide adducts on the diruthenium core of [Ru<sub>2</sub>(L)<sub>4</sub>]<sup>+</sup> (L = ap, CH<sub>3</sub>ap, Fap, or F<sub>3</sub>ap). Electronic properties and binding modes of the bridging ligand. *Inorg. Chem.* **2003**, 42, 6230-6240.
- (4) Chakravarty, A. R.; Cotton, F. A.; Tocher, D. A. Syntheses, molecular structures, and properties of two polar diruthenium(II,III) complexes of 2-hydroxypyridine and 2-anilinopyridine. *Inorg. Chem.* **1985**, 24, 172-177.
- (5) Xu, G.; Ren, T. Ru-s-butadiynyl complexes of the tetraanilinopyridinatodiruthenium core: Formation of a bis-adduct. *Organometallics* **2001**, 20, 2400-2404.
- (6) Chen, W. Z.; Silva, V. D.; Lin, C.; Abellard, J.; Marcus, D. M.; Ren, T. Azidotetrakis(diarylformamidinate)diruthenium(II,III) Compounds: Synthesis, Molecular Structures and Voltammetric Properties; Linear Free Energy Relationships in Dinuclear Compounds VII. *J. Cluster Sci.* **2005**, 16, 151-165.
- (7) Sheldrick, G. M. In *Acta Cryst*, 2008; Vol. A64; pp 112-112.
- (8) Sheldrick, G. M. Crystal structure refinement with SHELXL. *Acta Cryst. C* **2015**, 71, 3-8.
- (9) Sheldrick, G. M. SHELXL 2016; University of Göttingen, Germany. **2016**.
- (10) Evans, D. F. The Determination of the Paramagnetic Susceptibility. *J. Chem. Soc.* **1959**, 2003-2005.
- (11) Bain, G. A.; Berry, J. F. Diamagnetic corrections and Pascal's constants. *J. Chem. Educ.* **2008**, 85, 532-536.



- (12) Guennic, B. L.; Floyd, T.; Galan, B. R.; Autschbach, J.; Keister, J. B. Paramagnetic effects on the NMR spectra of "diamagnetic" ruthenium (bis-phosphine)(bis-semiquinone) complexes. *Inorg. Chem.* **2009**, *48*, 5504-5511.
- (13) Manowong, M.; Han, B.; McAloon, T. R.; Shao, J.; Guzei, I. A.; Ngubane, S.; Van Caemelbecke, E.; Bear, J. L.; Kadish, K. M. Effect of axial ligands on the spectroscopic and electrochemical properties of diruthenium compounds. *Inorg. Chem.* **2014**, *53*, 7416-7428.
- (14) Kadish, K. M.; Han, B.; Shao, J.; Ou, Z.; Bear, J. L. Synthesis and characterization of diruthenium complexes in low oxidation states. Formation of mono- and bis-CO adducts. *Inorg. Chem.* **2001**, *40*, 6848-6851.
- (15) Barral, M. C.; Herrero, S.; Jimenez-Aparicio, R.; Torres, M. R.; Urbanos, F. A. Carbonyl and nitrosyl diruthenium compounds: Crystal structure of [Ru<sub>2</sub>(O<sub>2</sub>CMe)(DPhF)<sub>3</sub>(CO)]BF<sub>4</sub> · CH<sub>2</sub>Cl<sub>2</sub> and its isomorphous nitrosyl analogue. *J. Organomet. Chem.* **2008**, *693*, 1597-1604.
- (16) Barral, M. C.; Herrero, S.; Jimenez-Aparicio, R.; Torres, M. R.; Urbanos, F. A. A spin-admixed ruthenium complex. *Angew. Chem. Int. Ed.* **2005**, *44*, 305-307.
- (17) *Gaussian 16 Rev. A.03*; Frisch, M. J.; Trucks, G. W.; Schlegel, H. B.; Scuseria, G. E.; Robb, M. A.; Cheeseman, J. R.; Scalmani, G.; Barone, V.; Petersson, G. A.; Nakatsuji, H.; Li, X.; Caricato, M.; Marenich, A. V.; Bloino, J.; Janesko, B. G.; Gomperts, R.; Mennucci, B.; Hratchian, H. P.; Ortiz, J. V.; Izmaylov, A. F.; Sonnenberg, J. L.; Williams, D.; Ding, F.; Lipparini, F.; Egidi, F.; Goings, J.; Peng, B.; Petrone, A.; Henderson, T.; Ranasinghe, D.; Zakrzewski, V. G.; Gao, J.; Rega, N.; Zheng, G.; Liang, W.; Hada, M.; Ehara, M.; Toyota, K.; Fukuda, R.; Hasegawa, J.; Ishida, M.; Nakajima, T.; Honda, Y.; Kitao, O.; Nakai, H.; Vreven, T.; Throssell, K.; Montgomery Jr., J. A.; Peralta, J. E.; Ogliaro, F.; Bearpark, M. J.; Heyd, J. J.; Brothers, E. N.; Kudin, K. N.; Staroverov, V. N.; Keith, T. A.; Kobayashi, R.; Normand, J.; Raghavachari, K.; Rendell, A. P.; Burant, J. C.; Iyengar, S. S.; Tomasi, J.; Cossi, M.; Millam, J. M.; Klene, M.; Adamo, C.; Cammi, R.; Ochterski, J. W.; Martin, R. L.; Morokuma, K.; Farkas, O.; Foresman, J. B.; Fox, D. J.: Wallingford, CT, 2016.
- (18) Vosko, S. H.; Wilk, L.; Nusair, M. Accurate spin-dependent electron liquid correlation energies for local spin density calculations: a critical analysis. *Can. J. Phys.* **1980**, *58*, 1200-1211.
- (19) Becke, A. D. Density-functional exchange-energy approximation with correct asymptotic behavior. *Phys. Rev. A* **1988**, *38*, 3098-3100.
- (20) Becke, A. D. Density-functional thermochemistry. III. The role of exact exchange. *J. Chem. Phys.* **1993**, *98*, 5648-5652.
- (21) Stephens, P. J.; Devlin, F. J.; Chabalowski, C. F.; Frisch, M. J. Ab Initio Calculation of Vibrational Absorption and Circular Dichroism Spectra Using Density Functional Force Fields. *J. Phys. Chem.* **1994**, *98*, 11623-11627.
- (22) Perdew, J. P. Density-functional approximation for the correlation energy of the inhomogeneous electron gas. *Phys. Rev. B* **1986**, *33*, 8822-24.
- (23) Andrae, D.; Häußermann, U.; Dolg, M.; Stoll, H.; Preuß, H. Energy-adjusted ab initio pseudopotentials for the second and third row transition elements. *Theor. Chim. Acta* **1990**, *77*, 123-141.
- (24) Weigend, F.; Ahlrichs, R. Balanced basis sets of split valence, triple zeta valence and quadruple zeta valence quality for H to Rn: Design and assessment of accuracy. *Phys. Chem. Chem. Phys.* **2005**, *7*, 3297-3305.
